# Supplementary material for: Mesoporous superacid catalysts for valorisation of refinery naphtha stream
Source: Royal Society of Chemistry journal article supplement (doi:10.1039/c8ra07024e), 2018-01-01

## Supplementary Information

**Table S1: Isomer distribution for C<sub>4</sub>-C<sub>6</sub> hydrocarbons obtained over prepared catalysts**

| Catalyst             | Pt@TPA@K6 | Pt@TPA@HMS | Pt@TPA@PS15 | Pt@TPA@S5 |
|----------------------|-----------|------------|-------------|-----------|
| nC <sub>4</sub>      | 2.14      | 1.59       | 2.55        | 1.75      |
| iC <sub>4</sub>      | 10.88     | 10.16      | 10.82       | 10.75     |
| Total C <sub>4</sub> | 13.02     | 11.75      | 13.37       | 12.50     |
| iC <sub>5</sub>      | 1.31      | 0.54       | 1.28        | 0.62      |
| nC <sub>5</sub>      | 0.63      | 0.15       | 0.57        | 0.16      |
| Cyclopentane         | 0.00      | 0.00       | 0.00        | 0.00      |
| Total C <sub>5</sub> | 1.94      | 0.69       | 1.85        | 0.78      |
| 2,2-DMB              | 0.02      | 0.05       | 0.03        | 0.04      |
| 2,3-DMB              | 0.14      | 0.19       | 0.16        | 0.17      |
| 2-MP                 | 0.78      | 0.37       | 0.79        | 0.43      |
| 3-MP                 | 0.59      | 0.21       | 0.56        | 0.32      |
| nC <sub>6</sub>      | 0.78      | 0.48       | 0.79        | 0.41      |
| Methylcyclopentane   | 0.14      | 0.15       | 0.19        | 0.21      |
| Cyclohexane          | 0.08      | 0.07       | 0.09        | 0.06      |
| Benzene              | 0.00      | 0.00       | 0.00        | 0.00      |
| Total C <sub>6</sub> | 2.53      | 1.52       | 2.61        | 1.64      |
| Total                | 16.93     | 13.18      | 17.10       | 14.10     |

**Table S2: Isomer distribution for C<sub>7</sub> hydrocarbons obtained over prepared catalysts**

| Catalyst                  | Pt@TPA@K6 | Pt@TPA@HMS | Pt@TPA@PS | Pt@TPA@S5 |
|---------------------------|-----------|------------|-----------|-----------|
| 2,2-dimethylpentane       | 0.16      | 1.54       | 0.74      | 0.45      |
| 2,4-dimethylpentane       | 0.25      | 1.69       | 1.26      | 0.93      |
| 2,2,3-trimethylbutane     | 0.05      | 0.27       | 0.26      | 0.17      |
| 3,3-dimethylpentane       | 0.16      | 2.42       | 0.50      | 0.29      |
| 2-methylhexane            | 1.40      | 4.23       | 4.24      | 1.60      |
| 2,3-dimethylpentane       | 0.87      | 2.17       | 1.52      | 1.10      |
| 1,1-dimethylcyclopentane  | 0.03      | 0.05       | 0.06      | 0.04      |
| 3-methylhexane            | 1.89      | 6.54       | 5.61      | 2.94      |
| 1c,3 dimethylcyclopentane | 0.03      | 0.00       | 0.04      | 0.05      |
| 3-ethylpentane            | 0.19      | 2.16       | 0.81      | 0.79      |
| n-heptane                 | 57.14     | 48.05      | 45.51     | 58.66     |
| Methylcyclohexane         | 0.10      | 0.16       | 0.22      | 0.14      |
| Toluene                   | 0.05      | 0.00       | 0.00      | 0.00      |
| Total C <sub>7</sub>      | 62.31     | 69.28      | 60.77     | 67.17     |

Figure S1: Ammonia TPD profiles obtained over prepared catalysts

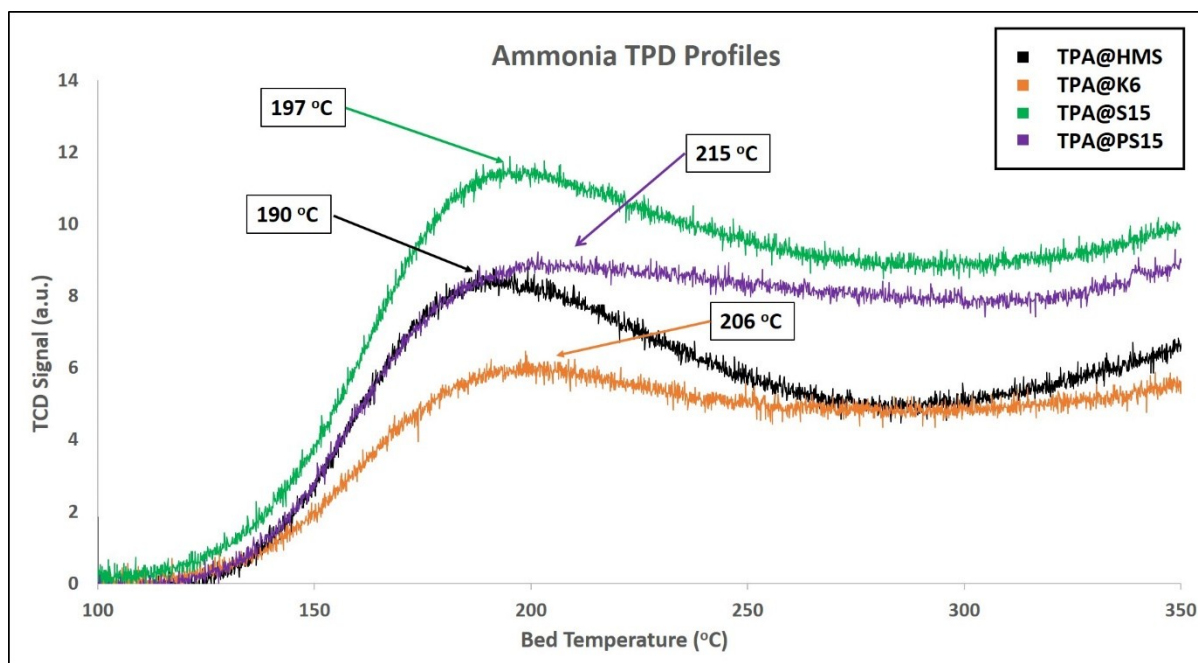

Supplement: c8ra07024e1.pdf [file c8ra07024e1.pdf]
